# Supplementary material for: Effects of alpha-cyclodextrin on water transport, cell hydration and longevity
Source: publisher site journal article supplement (doi:10.18632/aging.202533), 2021-01-19
Supplement: Supplementary file [file aging-v13i2-202533-supplementary-material-SD1.pdf]

## SUPPLEMENTARY TABLES

**Supplementary Table 1. Statistics for lifespan data seen in Figure 4A wild-type hermaphrodite animals were tested.**

|                              | <b>Number of worms</b> | <b>Mean lifespan (days)</b> | <b>SD (days)</b> | <b>SEM (days)</b> | <b>Log rank p value (with bonferroni correction)</b> | <b>Kruskal-wallis H test with Dunn's Post hoc test P value</b> |
|------------------------------|------------------------|-----------------------------|------------------|-------------------|------------------------------------------------------|----------------------------------------------------------------|
| control                      | 180                    | 10.21                       | 2.90             | 0.216             |                                                      |                                                                |
| 0.5 w/v% alpha-cyclodextrin  | 91                     | 10.64                       | 2.18             | 0.228             | vs control p=2.616                                   | vs control p=1.000                                             |
| 0.05 w/v% alpha-cyclodextrin | 156                    | 12.94                       | 2.88             | 0.230             | vs control p<0.000                                   | vs control p<0.000                                             |

**Supplementary Table 2. Statistics for lifespan data seen in Figure 4B wild-type hermaphrodite animals were tested.**

|                             | <b>Number of worms</b> | <b>Mean lifespan (days)</b> | <b>SD (days)</b> | <b>SEM (days)</b> | <b>Log rank p value</b> | <b>Independent T-test p value</b> |
|-----------------------------|------------------------|-----------------------------|------------------|-------------------|-------------------------|-----------------------------------|
| control                     | 135                    | 12.33                       | 2.90             | 0.249             |                         |                                   |
| 0.1 w/v% alpha-cyclodextrin | 126                    | 13.25                       | 2.68             | 0.238             | p=0.025                 | p=0.009                           |
